# Supplementary material for: Identification of therapeutic targets of the hijacked super-enhancer complex in EVI1-rearranged leukemia
Source: PubMed Central journal article supplement (PMC8550965; doi:10.1038/s41375-021-01235-z), 2021-04-28
Supplement: 41375_2021_1235_MOESM1_ESM.pdf [file 41375_2021_1235_MOESM1_ESM.pdf]

## 1 **Supplemental methods**

### 2 **Cell culture**

3 MUTZ-3 cells were cultured in 60% MEMalpha (Thermo Fisher Scientific, Waltham, MA,  
4 USA), 20% fetal bovine serum (FBS) (Biochrom AG, Berlin, Germany), 20% conditioned  
5 medium of 5637 cells, and 10 ng/mL GM-CSF (BIOZOL GmbH, Eching, Germany). UCSD-  
6 AML1 cells were cultured in 60% RPMI 1640 (Thermo Fisher Scientific) including the same  
7 supplements as MUTZ-3. HNT-34 and MOLM-1 were cultured in 80% RPMI 1640 and 20%  
8 FBS. U-937 and K-562 were cultured in 90% RPMI 1640 and 10% FBS. All cultures were  
9 supplemented with 1x penicillin/streptomycin (Thermo Fisher Scientific). Metabolic activity  
10 was measured by CellTiterGlo assay (Promega, Madison, WI, USA). Cell identity was  
11 confirmed by a Multiplex human Cell line Authentication Test and tested for mycoplasma  
12 contamination regularly.

### 13 **Lentiviral transduction**

14 Lentiviral packaging vectors pMD2.G and psPAX2 were a gift from D. Trono (Addgene  
15 plasmid #12259 and #12260). Lentiviruses were produced according to standard procedures  
16 in Lenti-X 293T cells (Takara Bio, Kusatsu, Japan). For lentiviral transduction, 6-well plates  
17 coated with RetroNectin (Takara Bio, Kusatsu, Japan) were used. 500  $\mu$ L of viral soup was  
18 added into a well of a 6-well plate with 2 mL medium and spun down for 45 min at 1 350 g  
19 and room temperature (RT).  $1 \times 10^6$  cells in 1 mL and 3  $\mu$ L polybrene (Merck KGaA,  
20 Darmstadt, Germany) were added and spun down for 5 min at 314 g and RT. Cells were  
21 transduced twice on consecutive days. Puromycin (InvivoGen, San Diego, CA, USA) was  
22 added at a concentration of 1  $\mu$ g/mL two days after the last transduction. Cells were selected  
23 for 3 days before samples were harvested.

### 24 **Western blot**

25 Cells were lysed in lysis buffer (50 mM Tris-HCl pH 7.5, 150 mM NaCl, 1 mM EDTA pH 8.0,  
26 1% (v/v) Triton X-100, 1x complete protease inhibitor (Roche, Basel, Switzerland)) for 20 min

27 on ice. Debris was pelleted for 30 min at 16 000 g and 4°C, and the supernatant was  
28 transferred into a fresh tube. SDS-Page and western blot were carried out according to  
29 standard procedures. The following antibodies were used for protein detection:  $\alpha$ -EV11  
30 (#2265; Cell Signaling, Beverly, MA, USA),  $\alpha$ -CEBPA D56F10 (#8178; Cell Signaling),  $\alpha$ -  
31 RUNX1 (sc-365644 X; Santa Cruz Biotechnology, Dallas, TX, USA),  $\alpha$ -IKZF1 D10E5  
32 (#9034S; Cell Signaling, Beverly),  $\alpha$ -PARP1 (#9542S; Cell Signaling),  $\alpha$ - $\beta$ -Actin (AM1829B;  
33 Biomol, Hamburg, Germany), and  $\alpha$ -GAPDH (sc-25778; Santa Cruz Biotechnologies).  
34 Western blots were imaged on an Odyssey CLx Imaging System (LI-COR Biosciences,  
35 Lincoln, NB, USA) using the Image Studio software (LI-COR Biosciences).

### 36 **Co-Immunoprecipitation**

37 Lysates were prepared as described previously in the western blot section. 75  $\mu$ g of total  
38 protein lysate were used as input control. Per IP, 3 mg of protein was used and diluted with  
39 500  $\mu$ L IP buffer (1% (v/v) Triton X-100, 0.5% (v/v) NP40, 50 mM Tris-HCl pH8.0, 5 mM  
40 EDTA). Triton X-100 was added to a final concentration of 2% (v/v). 10  $\mu$ L PARP1 antibody  
41 (ab227244, Abcam, Cambridge, UK) or 2  $\mu$ L control IgG (#2729S; Cell Signaling) were  
42 added to the lysates and the samples were incubated overnight on a thermoshaker at 4°C  
43 and 750 rpm. Per sample, 60  $\mu$ L Dynabeads Protein G for immunoprecipitation (Thermo  
44 Fisher Scientific) were washed with IP buffer and 60  $\mu$ L beads were added to each IP.  
45 Samples were rotated for 3 h at 4°C. Beads were placed on a magnet and washed seven  
46 times with wash buffer (20 mM Tris-HCl pH 8.0, 100 mM NaCl, 1 mM EDTA, 0.5% (v/v) NP-  
47 40) and two times with LiCl buffer (10 mM Tris-HCl pH 8.0, 1 mM EDTA pH 8.0, 250 mM LiCl,  
48 0.1 % (w/v) Na-deoxycholate, 0.5 % (v/v) NP-40). After washing, the beads were  
49 resuspended in 25  $\mu$ L 1x SDS sample loading buffer with reducing agent and boiled for 10  
50 min at 95°C. Beads were removed from the solution and the eluate was used for western blot  
51 analysis.

## 52 DNA streptavidin pull-down

53 Biotinylated DNA probes were generated with PCR using *Taq* DNA polymerase (Qiagen,  
54 Venlo, Netherlands) according to the manufacturer's protocol with the primers shown in  
55 **Table S1**. The enhancer-containing pGL3 plasmid was used as template for the *G2DHE*  
56 probe and MUTZ-3 genomic DNA for the chromosome Y control region. Nuclear lysate of  
57 non-fixed MUTZ-3 cells was prepared as described in the ChIP-SICAP methods section  
58 using 500  $\mu$ L lysis buffer (LB) 1, 1 mL LB2, and 100  $\mu$ L LB3 per  $10^7$  cells. NaCl was added to  
59 a final concentration of 450 mM. The chromatin in the nuclear lysate was sheared  
60 mechanically by pulling it at least six times through a 21G and six times through a 23G  
61 syringe. Lysates were centrifuged for 30 min at 16 000 g and 4°C. The supernatant was  
62 transferred into a new tube and the pellet discarded. 30  $\mu$ g of the nuclear lysate was used as  
63 input control. 1.2 mg of nuclear lysate was used per sample. Each sample was diluted 1:3  
64 with Buffer C (20 mM HEPES-KOH pH 7.9, 1.5 mM  $MgCl_2$ , 0.2 mM EDTA, 0.5 mM DTT, 1x  
65 complete Protease Inhibitor (Roche)) to reach a NaCl concentration of 150 mM. Sonicated  
66 salmon sperm DNA was added to the lysate at a final concentration of 100  $\mu$ g/mL to block  
67 unspecific protein-DNA interactions. Samples were rotated for 20 min at 4°C and 25 rpm. 1.2  
68  $\mu$ g of biotinylated DNA probe was added per sample, and samples were rotated for 30 min at  
69 4°C and 25 rpm. 60  $\mu$ L streptavidin beads (S1420S; New England Biolabs, Frankfurt am  
70 Main, Germany) were added to each sample and samples were rotated for 30 min at RT and  
71 25 rpm. Supernatant was discarded and beads were transferred into a fresh tube with 400  $\mu$ L  
72 Buffer C with 150 mM NaCl. Beads were washed seven times with 400  $\mu$ L Buffer C with 150  
73 mM NaCl. 30  $\mu$ L of the last wash step were kept as control. Beads were resuspended in 30  
74  $\mu$ L 1x NuPAGE LDS Sample Buffer with 1x NuPAGE Sample Reducing Agent (Thermo  
75 Fisher Scientific, Waltham, MA, USA) and heated to 95°C for 10 min. Beads were discarded  
76 and the supernatant was used for SDS-PAGE and western blot analysis.

77

## 78 **Next generation sequencing**

### 79 **ChIP-Seq**

80 Cells were fixed with 1% (v/v) methanol-free formaldehyde (Thermo Fisher Scientific) for  
81 10 min. The reaction was stopped by adding glycine to a final concentration of 125 mM and  
82 incubation at RT for 5 min. Nuclear lysates were prepared as described in the ChIP-SICAP  
83 section by using 250  $\mu$ L LB1, 500  $\mu$ L LB2, and 475  $\mu$ L LB3 per  $5 \times 10^6$  cells. Samples were  
84 split in sonication tubes with 150  $\mu$ L volume per tube. Shearing of the chromatin was  
85 performed by sonication in a Bioruptor Pico device (Diagenode, Seraing, Belgium). 220  $\mu$ L of  
86 RIPA buffer I (10 mM Tris-HCl pH 8.0, 1 mM EDTA pH 8.0, 140 mM NaCl, 0.1% (w/v) Na-  
87 deoxycholate) were added to each tube. Samples were spun for 10 min at 12 000 g at 4°C.  
88 The supernatant was pooled. The pellet was resuspended in 370  $\mu$ L of RIPA buffer I and  
89 spun again. The supernatant was pooled with the previous supernatant. 50  $\mu$ L of input were  
90 taken aside. Dynabeads Protein G for Immunoprecipitation (Thermo Fisher Scientific) were  
91 coupled to  $\alpha$ -CEBPA D56F10 (#8178; Cell Signaling) antibody and rotated with the sheared  
92 chromatin at 4°C overnight. The supernatant was discarded and the beads were transferred  
93 into a PCR tube with 180  $\mu$ L of RIPA buffer with 0.1% (w/v) SDS. The beads were washed  
94 five times with RIPA buffer with 0.1% (w/v) SDS, twice with RIPA-500 (10 mM Tris-HCl pH  
95 8.0, 1 mM EDTA pH 8.0, 500 mM NaCl, 1% Triton X-100, 0.1% SDS; 0.1% (w/v) Na-  
96 deoxycholate), twice with LiCl wash buffer (10 mM Tris-HCl pH 8.0, 1 mM EDTA pH 8.0,  
97 250 mM LiCl, 0.1% (w/v) Na-deoxycholate, 0.5% NP-40), and twice with 1x TE. The beads  
98 were air-dried and eluted in 50  $\mu$ L direct elution buffer (10 mM Tris-HCl pH 8.0; 10 mM EDTA  
99 pH 8.0, 300 mM NaCl, 0.5% (w/v) SDS). Eluates and the input were digested with RNase A  
100 (10 mg/ml, Thermo Fisher Scientific), proteinase K (20 mg/mL, Thermo Fisher Scientific), and  
101 decrosslinked. Samples were purified with AMPure XP beads (Beckman Coulter, Brea, CA,  
102 USA). Library preparation was performed using the NEBNext system for Illumina (New  
103 England Biolabs, Frankfurt am Main, Germany) according to the manufacturer's protocol.  
104 Samples were sequenced on a HiSeq 2000 v4 platform (Illumina, San Diego, CA, USA) with

105 50 bp single reads. Reads were aligned to human genome version hg19, and the input was  
106 subtracted as background using an in-house pipeline. Integrative Genome Viewer version  
107 2.6.3 (Broad Institute, Cambridge, MA, USA) was used for the visualization. RUNX-1 ChIP-  
108 Seq data from *de novo* AML cell patients were published previously and online available  
109 (GEO Accession number GSM3734708).<sup>1</sup>

## 110 **RNA-Seq**

111 Cells were treated with PARP inhibitors or DMSO and harvested at various time points or  
112 they were lentivirally transduced with *EVI1* shRNAs and harvested after selection. RNA was  
113 extracted using the RNeasy Plus Mini Kit (Qiagen, Venlo, Netherlands), and extracts with  
114 RIN values >8 were sent for sequencing. Library preparation was performed according to  
115 standard procedures by the DKFZ Genomics and Proteomics Core Facility. Samples were  
116 sequenced on an Illumina HiSeq 4000 with paired-end 100 bp reads. Bioinformatic analysis  
117 was performed as described below. Published RNA-Seq data from AML samples and cell  
118 lines were reanalyzed as described previously.<sup>2,3</sup>

## 119 **Processing of PARPi and *EVI1* knockdown RNA-Seq data**

120 Reads were aligned to the genome in a 2-pass alignment procedure using STAR aligner (v.  
121 2.7.3a). First, the genome index for the Genome Reference Consortium Human Build version  
122 38 was built with STAR, then reads were aligned, a new index was created using splice  
123 junction information from the first pass, and finally, reads were re-aligned to yield the final  
124 alignment files in sorted BAM format. Duplicate reads were marked using PICARD  
125 MarkDuplicates (v. 2.21.2), and BAM files from multiple sequencing lanes that belong to the  
126 same samples were merged using samtools merge (v. 1.9). Gene-level read counting was  
127 performed using the Rsubread package (Bioconductor version 3.10). TPM values were then  
128 calculated by first normalizing the raw counts per gene length and then scaling them per  
129 million.

## 130 **Determination of differential genes**

131 Top most variable 1 500 genes in the anti-PARP treatment were selected, and clustered into  
132 4 profile clusters using k-means. Differential genes were determined using DESeq2, using  
133 the following design: (1) for the anti-PARP treatment experiment, time and treatment type  
134 were used as variables, including an interaction term. We selected genes for which the  
135 interaction term was significant (2) for the shEVI1 experiments, we considered the time-  
136 points (day 3 and day 6) as replicates, and determined the differential genes between shRNA  
137 treatment and control.

## 138 **4C-Seq**

139 4C experiments were conducted as described previously.<sup>2,4</sup> DpnII was used as first cutter  
140 and Csp6I as second cutter. The primers shown in **Table S5** were used for library generation.  
141 Sequencing was performed on a HiSeq 2000 v4 platform (Illumina) with 50 bp single reads.  
142 4C-Seq fastq files were demultiplexed using the viewpoint specific barcodes. Reads were  
143 trimmed using TrimGalore, and aligned using BWA on the hg19 genome. Aligned reads were  
144 processed using a custom made pipeline implementing methods inspired by the FourCSeq  
145 package in order to produce smoothed bigwig files obtained by smoothing the signal over a  
146 number of neighbouring fragments (typically 21).<sup>5</sup> Integrative Genome Viewer version 2.6.3  
147 (Broad Institute) was used for the visualization.

## 148 **ChIP-SICAP**

149 Cells were fixed with 1.5% (v/v) methanol-free formaldehyde for 15 min, and the reaction was  
150 stopped with 125 mM glycine. Instead of permeabilizing the fixed cells with Triton X-100 in  
151 TE buffer, a two-step lysis protocol was used. For this, the outer cell membrane was lysed for  
152 10 min in 1 mL of LB1 (50 mM HEPES-KOH pH 7.5, 140 mM NaCl, 1 mM EDTA, 10% (v/v)  
153 glycerol, 0.5% (v/v) NP40, 0.25% (v/v) Triton X-100, 1x complete protease inhibitor; Roche)  
154 per  $25 \times 10^6$  cells and then centrifuged for 2 min at 1 000 g and 4°C. The nuclear pellet was  
155 incubated with 2 mL LB2 (10 mM Tris-HCl pH 8.0, 200 mM NaCl, 1 mM EDTA, 0.5 mM  
156 EGTA, 1x complete protease inhibitor) for 5 min, centrifuged again and the pellet was

157 resuspended in 600  $\mu$ L LB3 (10 mM Tris-HCl pH 8.0, 100 mM NaCl, 1 mM EDTA, 0.5 mM  
158 EGTA, 0.1% (w/v) Na-deoxycholate, 0.5% (w/v) N-lauroylsarcosine, 1x complete protease  
159 inhibitor) to extract the nuclear fraction. Sonication was performed in tubes with 300  $\mu$ L  
160 volume on a Bioruptor Pico (Diagenode, Seraing, Belgium) device with 30 s ON/ 30 s OFF  
161 intervals for 20-30 cycles. Triton X-100 was added to a final concentration of 1% (v/v), and 1-  
162 5% of total sample volume was taken as input control. The respective amounts of antibodies  
163 were added to each sample: 14  $\mu$ L of  $\alpha$ -CEBPA D56F10 (#8178; Cell Signaling, Beverly, MA,  
164 USA), 5  $\mu$ g of  $\alpha$ -RUNX1 (ab23980; Abcam, Cambridge, UK), and 5  $\mu$ g of control IgG  
165 (#2729S; Cell Signaling). Samples were vortexed and incubated overnight at 750 rpm and  
166 4°C in a thermomixer. 500  $\mu$ L IP buffer (50 mM Tris-HCl pH 7.5-8, 5 mM EDTA, 1% (v/v)  
167 Triton X-100, 0.5% (v/v) NP40) and 60  $\mu$ L magnetic Dynabeads Protein G for  
168 immunoprecipitation (Thermo Fisher Scientific) were added per sample, and the sample was  
169 head-to-tail rotated for 3 h at 4°C. Beads were washed and sheared chromatin was  
170 biotinylated, followed by an additional wash step as published previously.<sup>6</sup> Elution of the  
171 complexes from the protein G beads was done for 30 min instead of 15 min with 7.5% (w/v)  
172 SDS and 200 mM 1,4-dithiothreitol (DTT). The supernatant was diluted with 1 mL IP buffer  
173 with 150 mM NaCl. LysC-resistant magnetic streptavidin beads (S1420S; New England  
174 Biolabs, Frankfurt am Main, Germany) were generated as described previously and 100  $\mu$ L  
175 beads were added to the supernatant.<sup>7</sup> DNA-bound protein complexes were purified as  
176 described before, followed by one washing step with isopropanol and one with acetonitrile  
177 wash buffer, respectively.<sup>6</sup> Digestion of the eluted proteins was performed using 300 ng of  
178 LysC (12505061; Wako Chemicals, Neuss, Germany) for 16 h at 37°C. Digested peptides  
179 and the DNA fraction were cleaned up according to the SP3 protocol as described  
180 previously.<sup>6</sup>

## 181 **Mass spectrometry**

182 Cleaned up peptides were loaded on a trap column (PepMap100 C18 Nano-Trap 100  $\mu$ m x  
183 2 cm) and separated over a 25 cm analytical column (Waters nanoEase BEH, 75  $\mu$ m x

184 250 mm, C18, 1.7  $\mu\text{m}$ , 130  $\text{\AA}$ .) using the Thermo Easy nLC 1200 nanospray source (Thermo  
185 EasynLC 1200; Thermo Fisher Scientific). Solvent A was water with 0.1% formic acid and  
186 solvent B was 80% acetonitrile, 0.1% formic acid. During the elution step, the percentage of  
187 solvent B increased in a linear fashion from 3% to 8% in 4 min, then increased to 10% in 2  
188 min, to 32% in 68 min, to 50% in 12 min, and finally to 100% in a further 1 min and went  
189 down to 3% for the last 11 min. Peptides were analyzed on a Tri-Hybrid Orbitrap Fusion  
190 mass spectrometer (Thermo Fisher Scientific) operated in positive (+2 kV) data dependent  
191 acquisition mode with HCD fragmentation. The MS1 and MS2 scans were acquired in the  
192 Orbitrap and ion trap, respectively with a total cycle time of 3 s. MS1 detection occurred at  
193 120 000 resolution, AGC target 1E6, maximal injection time 50 ms and a scan range of 375-1  
194 500 m/z. Peptides with charge states 2 to 4 were selected for fragmentation with an  
195 exclusion duration of 40 s. MS2 occurred with CE 33%, detection in topN mode, and scan  
196 rate was set to Rapid. AGC target was 1E4 and maximal injection time allowed of 50 ms.  
197 Data were recorded in centroid mode.

## 198 **Bioinformatic analysis of ChIP-SICAP data**

199 Raw files were analyzed using MaxQuant version 1.5.3.30 (Max-Planck-Institute of  
200 Biochemistry, Martinsried, Germany) including the Andromeda search engine.<sup>8,9</sup> Peptides  
201 were identified using the Uniprot *Homo sapiens* database concatenated to a database  
202 containing protein sequences of contaminants. Default MaxQuant parameters were used  
203 with the following modifications: digestion with LysC, default variable modification  
204 (methionine oxidation and N-terminal acetylation), cytosine carbamidomethylation as fixed  
205 modification, and minimum peptide length 5. FDR was set to 1% at both protein and peptide  
206 level. Match between runs option was enabled, Label Free Quantification (LFQ) and iBAQ  
207 calculated. Further bioinformatics analyses were performed using an in-house pipeline as  
208 follows: known contaminants were removed and fold change of the bait sample intensities  
209 over the IgG control intensities was computed. The maximum ratio was limited to 20 and the  
210 minimum ratio to 0.5. P-values were calculated with the Limma package and adjusted to



211 Benjamini-Hochberg (adjusted p-value).<sup>10</sup> Identified proteins with an adj. p-value≤0.10 were  
212 considered relevant. Pathway enrichment analysis was performed using DAVID 6.8  
213 (<https://david.ncifcrf.gov/home.jsp>).<sup>11,12</sup>

## 214 **Quantitative PCR**

215 The DNA fractions of ChIP-SICAP experiments were purified with AMPure XP beads  
216 (Beckman Coulter). ChIP-SICAP qPCR was performed using the TB Green Premix  
217 DimerEraser master mix (Takara Bio, Kusatsu, Japan) according to the manufacturer's  
218 protocol with the primers shown in **Table S1**. Samples were analyzed with a Light Cycler 480  
219 system (Roche).

220 For RT-qPCR, mRNA was extracted using the RNeasy Plus Kit (Qiagen, Venlo, Netherlands)  
221 and transcribed into cDNA using the SuperScript III First-Strand Synthesis System (Thermo  
222 Fisher Scientific) according to the manufacturer's protocols. iTaq Universal SYBR Green  
223 Supermix (Bio-Rad Laboratories, Hercules, CA, USA) was used for qPCR according to the  
224 manufacturer's protocol with the primers shown in **Table S1**. Samples were run on a CFX96  
225 system (Bio-Rad Laboratories) and analyzed using the CFX Maestro Software (Bio-Rad  
226 Laboratories).

## 227 **May-Grünwald-Giemsa staining**

228  $8 \times 10^4$  cells were resuspended in 150  $\mu$ L PBS and fixed on a slide using a Shandon CytoSpin  
229 3 device (Thermo Fisher Scientific) for 5 min at 500 rpm. Slides were stained with May-  
230 Grünwald (Sigma-Aldrich, St. Louis, MO, USA) for 3 min, washed three times for 1 min with  
231 water, stained with Giemsa (Sigma-Aldrich, St. Louis, MO, USA) for 10 s and washed four  
232 times for 1 min with water. The slides were mounted with a drop of Entellan (Merck Millipore,  
233 Burlington, MA, USA) and dried for 24 h. Samples were imaged on a Cell Observer (Zeiss,  
234 Oberkochen, Germany) with 40x oil objective using the software ZEN blue (Zeiss).

## 235 **Flow cytometry**

236 Apoptosis staining was carried out according to the FITC Annexin V Apoptosis Detection Kit I  
237 (BD Bioscience, San Jose, CA, USA) manufacturer's protocol with the following  
238 modifications: 2.5  $\mu$ L Annexin-V antibody were used, 7-aminoactinomycin (7-AAD) was used  
239 instead of propidium iodide.

240 For staining with differentiation markers,  $1 \times 10^6$  cells were resuspended in 50  $\mu$ L FACS Buffer  
241 (PBS with 2% FBS). Antibodies against cell surface markers were added (CD34-PerCPCy5.5,  
242 #343611; Biolegend, San Diego, CA, USA), CD11b-APC (#301309; BioLegend), CD14-  
243 APCH7 (M $\phi$ P9; BD Biosciences), and the samples were incubated for 15 min at 4°C in the  
244 dark. 150  $\mu$ L of 1  $\mu$ g/mL DAPI (4',6-diamidino-2-phenylindole) solution (BSBTAR1176; VWR,  
245 Darmstadt, Germany) was added to 50  $\mu$ L of cells, and the samples were incubated for 5 min  
246 at 4°C in the dark. Cells were washed with 3 mL PBS with 5% FBS and resuspended in  
247 100  $\mu$ L fixation medium (FIX & PERM Reagent A; Thermo Fisher Scientific). The samples  
248 were incubated for 15 min at RT in the dark and washed once with 3 mL PBS with 5% FBS.  
249 The cells were resuspended in 100  $\mu$ L permeabilization medium (FIX & PERM Reagent B,  
250 Thermo Fisher Scientific), and the intracellular antibody (cMPO-FITC, sc-51741 FITC; Santa  
251 Cruz Biotechnology, Dallas, TX, USA or  $\gamma$ H2AX-Alexa488, 560445, BD Biosciences) was  
252 added. The samples were incubated for 20 min at RT in the dark and washed with 3 mL PBS  
253 with 5% FBS. Cells were resuspended in 300  $\mu$ L FACS buffer. All samples were acquired on  
254 a FACSCelesta device (BD Biosciences) using FACSDiva software (BD Biosciences).

## 255 **Statistical analysis and data presentation**

256 Unless otherwise stated, statistical significance was calculated using two-sided two-sample t-  
257 tests or two-sided one-sample t-tests. Values were assumed to be normally distributed.  
258 Exact replicate numbers for the DLA assays are shown in **Table S6**.

259 Plots were generated using the ggplot2 R package version 3.3.2.<sup>13</sup> Boxplots show the  
260 median. The lower and upper hinges of the boxplots correspond to the first and third quartiles

261 and the whiskers extend to the smallest and largest value as long as their distance from the  
 262 hinge is smaller than 1.5× inter-quartile range.

263 Sequence logos were generated using seqLogo R package version 1.56.0.<sup>14</sup> FACS plots  
 264 were generated with the FACSDiva or FlowJo software. The Integrative Genomics Viewer  
 265 (IGV) was used for visualization of ChIP-Seq and 4C-Seq tracks. Affinity Designer was used  
 266 for illustrations.

## 267 Supplemental tables

268 **Table S1.** List of oligonucleotides and primers with name, sequences, and applied method.  
 269 PD = pull-down

| Name           | Sequence                                      | Method        |
|----------------|-----------------------------------------------|---------------|
| EnhCore-for    | tttGGATCCACTCCAAGCACCTGCCAAGGC                | cloning pGL3  |
| EnhCore-rev    | tttGTCGACCTCCAGGTGTCCAGAGCCCG                 | cloning pGL3  |
| EnhRight-for   | tttGGATCCGAAGGCCTGGGGATGGTGAGG                | cloning pGL3  |
| EnhLeft-rev    | tttGTCGACCCTCACCATCCCCAGGCCTTC                | cloning pGL3  |
| 5' mirE-XhoI   | TACAATACTCGAGAAGGTATATTGCTGTTGACAGTGAGCG      | miR-E cloning |
| 3' mirE-EcoRI  | TTAGATGAATTCTAGCCCCTTGAAGTCC<br>GAGGCAGTAGGCA | miR-E cloning |
| SGEP-SEQ       | TGTTTGAATGAGGCTTCAGTAC                        | sequencing    |
| pGL3-p300-for  | GATGAGTTTGGACAAACCAC                          | sequencing    |
| pGL3-p300-rev  | GAGCTGACTGGGTTGAAG                            | sequencing    |
| qPCR-Enh-for   | CTCCCTGCATCCGTTACTTG                          | ChIP-qPCR     |
| qPCR-Enh-rev   | CAGCCTGCTTTACCACATCA                          | ChIP-qPCR     |
| ChIP-CTRL1-for | TACTAACTTCGTGGTGGCGT                          | ChIP-qPCR     |
| ChIP-CTRL1-rev | TGGAGTGAAAGGCCCTGAAA                          | ChIP-qPCR     |
| ChIP-CTRL2-for | TAGGTAGCGTGCTGTTTGGG                          | ChIP-qPCR     |
| ChIP-CTRL2-rev | TGCTCTCAATGCAACCCTGA                          | ChIP-qPCR     |
| qPCR-EVI1-for  | AGTGCCCTGGAGATGAGTTG                          | RT-qPCR       |
| qPCR-EVI1-rev  | CTGCTTAAGTTCCTCTGGCAC                         | RT-qPCR       |
| qPCR-PBGD-for  | GGCAATGCGGCTGCAA                              | RT-qPCR       |
| qPCR-PBGD-rev  | GGGTACCCACGCGAATCAC                           | RT-qPCR       |
| PD-Enh-for     | CCACAGGCAGTGGACGG                             | PD PCR        |
| PD-Enh-rev     | [Biotin]-ATCCCCAGGCCTTCACATC                  | PD PCR        |
| PD-ChrY-For    | TGTAGCCACTTCAAGGACTCT                         | PD PCR        |
| PD-ChrY-Rev    | [Biotin]-ACGAGATGTGTCCACCTACT                 | PD PCR        |

270

271  
272

**Table S2.** List of mutagenesis primers with mutant number (Mut) and sequences. Mutations are marked in lowercase letters.

| Mut    | Sequence                                                          |
|--------|-------------------------------------------------------------------|
| 1-for  | GGGGACATGCCACCCCgatgGGCAGTGGACGGGGCC                              |
| 1-rev  | GGCCCCGTCCACTGCCcatcGGGGTGGCATGTCCCC                              |
| 2-for  | CCCACAGGCAGTGcAtGGGGCCTCCCTGC                                     |
| 2-rev  | GCAGGGAGGCCCCaTgCACTGCCTGTGGG                                     |
| 3-for  | CCAGACTCTGCCACCCGCACAGgAGctccAGATAGTTTGTGAAATACCCTG               |
| 3-rev  | CAGGGTATTTACAAACTATCTggagCTcCTGTGCGGTGGGCAGAGTCTGG                |
| 4-for  | CGCACAGCAGTGATAGATAGTaacTGAcATACCCTGAGCTTGCGGTTGA                 |
| 4-rev  | TCAACCGCAAGCTCAGGGTATgTCAgttACTATCTATCACTGCTGTGCG                 |
| 5-for  | GATAGATAGTTTGTGAAATACCCTGAGCacGCttTGACCAGAATTCTGAAAT<br>AATTCCATT |
| 5-rev  | AATGGAATTATTTCAGAATTCTGGTCAAaaGCgtGCTCAGGGTATTTACAAA<br>CTATCTATC |
| 6-for  | CCTGAGCTTGCGGTTGACCAGAAccCTGAgATAATTCCATTGAGACCGGAATTC            |
| 6-rev  | GAATTCCGGTCTCAATGGAATTATgTCAGggTTCTGGTCAACCGCAAGCTCAGG            |
| 7-for  | CCATTGAGACgtacATTCATGCAATGTTCTGTATCCTGATGTGGTAAAGCAGGCTGCCC       |
| 7-rev  | GCATGAATgtacGTCTCAATGGAATTATTTCAGAATTCTGGTCAACCGCAAGCTCAGGGT      |
| 8-for  | CCGGAATTCATGCAATGTTCTGTATtgcGcaGTaGTAAGCAGGCTGCCCGCGGGGG          |
| 8-rev  | CCCCCGCGGGCAGCCTGCTTTACTcGcaATACAGAACATTGCATGAATTCCGG             |
| 9-for  | GGGGCTTCTGCCACCCtttCTCGCatACGGGCTCCGGAAGGC                        |
| 9-rev  | GCCTTCCGAGCCCCGtatGCGAGaaaGGGTGGCAGAAGCCCC                        |
| 10-for | CGCCCACGGGCTCatGAAGGCCCATCTG                                      |
| 10-rev | CAGATGGGCCTTCatGAGCCCGTGGGCG                                      |
| 11-for | CGGGCTCCGGAAGGCCCATCTagtAGGAGCAGGGC                               |
| 11-rev | GCCCTGCTCCTactAGATGGGCCTTCCGGAGCCCCG                              |
| 12-for | TCTGACAGGAGCAGGGCCCTtggccGCACCACCTGACCAGGAG                       |
| 12-rev | CTCCTGGTCAGGTGGTGCggccaaAGGGCCCTGCTCCTGTGAGA                      |
| 13-for | GGAGCAGGGCCCTGATAAGggtatgCTGACCAGGAGGCCCCCGG                      |
| 13-rev | CCGGGGGCCCTCTGGTCAGcataccCTTATCAGGGCCCTGCTCC                      |
| 14-for | CCCCCGGCAGAGAGATTAATGCACAAATTacgcACAACCTCCCCATGC                  |
| 14-rev | GCATGGGGAGGTTGTgcgtAATTTGTGCATTAATCTCTGCCGGGGG                    |
| 15-for | CCGCAGAGGAGCAGGaCaaGGGGGCACTGGGAAA                                |
| 15-rev | TTTCCAGTGCCCCctGtCCTGCTCCTCTGCGG                                  |
| 16-for | GCACTGGGAAAGGAAGtttAGAGGAGGCCTCACCC                               |
| 16-rev | GGGTGAGGCCTCCTCTaaaCTTCCTTTCCAGTGC                                |
| 17-for | GGCCTGGCCTCCCGaccCCTCTCCTAAGCCC                                   |
| 17-rev | GGGCTTAGGAGAGGggtCGGGAGGCCAGGCC                                   |
| 18-for | GCAGGGGACACGCCATgcaTCTGCAGAGGCAGG                                 |
| 18-rev | CCTGCCTCTGCAGAtgcATGGCGTGTCCCCTGC                                 |
| 19-for | GCCACCCCCACAGGtgaTGGACGGGGCCTCC                                   |
| 19-rev | GGAGCCCCCGTCCAtcaCCTGTGGGGGTGGC                                   |
| 20-for | GCCCACCGCACAGCAGTGATAGATccaTTGTGAAATACCCTGA                       |
| 20-rev | TCAGGGTATTTACAAAtggATCTATCACTGCTGTGCGGTGGGC                       |

|               |                                                     |
|---------------|-----------------------------------------------------|
| <b>21-for</b> | TTGTGAAATACCCTGAGCTTGCGccgGACCAGAATTCTGAAATAATTCC   |
| <b>21-rev</b> | GGAATTATTTTCAGAATTCTGGTCcggCGCAAGCTCAGGGTATTTTCACAA |

273

274 **Table S3.** List of 97-mer oligonucleotides used for miR-E cloning. Sequences were extracted  
 275 from the Genome-wide Sensor-Based shRNA Prediction by Fellmann *et al.* (see ID).<sup>15</sup> The  
 276 targeted protein and the sequence are given. SCR = Scrambled control.

| shRNA ID          | Target                  | Sequence                                                                                               |
|-------------------|-------------------------|--------------------------------------------------------------------------------------------------------|
| <b>CEBPA.2538</b> | CEBPA                   | TGCTGTTGACAGTGAGCGATCACTCTAGATGTTTTATGTATAGTGAAGC<br>CACAGATGTATACATAAAAACATCTAGAGTGAGTGCCTACTGCCTCGGA |
| <b>CEBPA.1471</b> | CEBPA                   | TGCTGTTGACAGTGAGCGATGCCTTGGAAATGCAAACATCATAGTGAAGCC<br>ACAGATGTATGAGTTTGCATTTCCAAGGCACTGCCTACTGCCTCGGA |
| <b>RUNX1.524</b>  | RUNX1                   | TGCTGTTGACAGTGAGCGCTCGGCAGAACTAGATGATCATAGTGAAGC<br>CACAGATGTATGATCATCTAGTTTCTGCCGATTGCCTACTGCCTCGGA   |
| <b>RUNX1.468</b>  | RUNX1                   | TGCTGTTGACAGTGAGCGAACCTACCACAGAGCCATCAAATAGTGAAGC<br>CACAGATGTATTTGATGGCTCTGTGGTAGGTGTGCCTACTGCCTCGGA  |
| <b>/</b>          | SCR                     | TGCTGTTGACAGTGAGCGCCACTTCAGATCGTAAGGAGAATAGTGAAGC<br>CACAGATGTATTCTCCTTACGATCTGAAGTGATGCCTACTGCCTCGGA  |
| <b>Ren.713</b>    | <i>Renilla</i><br>(REN) | Already present in SGEP empty vector                                                                   |

277

278 **Table S4.** Known CEBPA and RUNX1 interactors identified by ChIP-SICAP with references  
 279 of previous reports.

| Protein      | Interactor | References                                                                                                                                                                                                                                                                                                                                                                                                                                                                                                                                  |
|--------------|------------|---------------------------------------------------------------------------------------------------------------------------------------------------------------------------------------------------------------------------------------------------------------------------------------------------------------------------------------------------------------------------------------------------------------------------------------------------------------------------------------------------------------------------------------------|
| <b>CEBPA</b> | CEBPB      | Cao <i>et al.</i> (1991) <sup>16</sup> , Lin <i>et al.</i> (2005) <sup>17</sup> , Tomaru <i>et al.</i> (2009) <sup>18</sup>                                                                                                                                                                                                                                                                                                                                                                                                                 |
|              | CEBPG      | Reinke <i>et al.</i> (2013) <sup>19</sup>                                                                                                                                                                                                                                                                                                                                                                                                                                                                                                   |
|              | EP300      | Rodríguez-Ubrea <i>et al.</i> (2012) <sup>20</sup>                                                                                                                                                                                                                                                                                                                                                                                                                                                                                          |
|              | PARP1      | Yin <i>et al.</i> (2006) <sup>21</sup>                                                                                                                                                                                                                                                                                                                                                                                                                                                                                                      |
|              | SMARCD2    | Grebien <i>et al.</i> (2015) <sup>22</sup>                                                                                                                                                                                                                                                                                                                                                                                                                                                                                                  |
| <b>RUNX1</b> | ARID1A     | Huber <i>et al.</i> (2017) <sup>23</sup>                                                                                                                                                                                                                                                                                                                                                                                                                                                                                                    |
|              | CBFB       | Kitabayashi <i>et al.</i> (2001) <sup>24</sup> , Shia <i>et al.</i> (2012) <sup>25</sup> , Nguyen <i>et al.</i> (2005) <sup>26</sup> , Philipot <i>et al.</i> (2010) <sup>27</sup> , Imai <i>et al.</i> (2004) <sup>28</sup> , Yamaguchi <i>et al.</i> (2004) <sup>29</sup> , Kim <i>et al.</i> (2013) <sup>30</sup> , Leong <i>et al.</i> (2016) <sup>31</sup> , Warren <i>et al.</i> (2000) <sup>32</sup> , Yonezawa <i>et al.</i> (2017) <sup>33</sup> , Luck <i>et al.</i> (2020) <sup>34</sup> , Yu <i>et al.</i> (2012) <sup>35</sup> |
|              | DPF2       | Huber <i>et al.</i> (2017) <sup>23</sup>                                                                                                                                                                                                                                                                                                                                                                                                                                                                                                    |
|              | EP300      | Yamaguchi <i>et al.</i> (2004) <sup>29</sup> , Aikawa <i>et al.</i> (2006) <sup>36</sup>                                                                                                                                                                                                                                                                                                                                                                                                                                                    |
|              | FUBP1      | Huber <i>et al.</i> (2017) <sup>23</sup>                                                                                                                                                                                                                                                                                                                                                                                                                                                                                                    |
|              | HNRNPR     | Huber <i>et al.</i> (2017) <sup>23</sup>                                                                                                                                                                                                                                                                                                                                                                                                                                                                                                    |
|              | HNRNPU     | Huber <i>et al.</i> (2017) <sup>23</sup>                                                                                                                                                                                                                                                                                                                                                                                                                                                                                                    |
|              | IKZF1      | Zhou <i>et al.</i> (2019) <sup>37</sup>                                                                                                                                                                                                                                                                                                                                                                                                                                                                                                     |
|              | KHSRP      | Huber <i>et al.</i> (2017) <sup>23</sup>                                                                                                                                                                                                                                                                                                                                                                                                                                                                                                    |
|              | NONO       | Huber <i>et al.</i> (2017) <sup>23</sup>                                                                                                                                                                                                                                                                                                                                                                                                                                                                                                    |
|              | RBBP4      | Yu <i>et al.</i> (2012) <sup>35</sup>                                                                                                                                                                                                                                                                                                                                                                                                                                                                                                       |
|              | RPA1       | Huber <i>et al.</i> (2017) <sup>23</sup>                                                                                                                                                                                                                                                                                                                                                                                                                                                                                                    |
|              | SET        | Yu <i>et al.</i> (2012) <sup>35</sup>                                                                                                                                                                                                                                                                                                                                                                                                                                                                                                       |
|              | SMARCC1    | Huber <i>et al.</i> (2017) <sup>23</sup> , Bakshi <i>et al.</i> (2010) <sup>38</sup> , Yu <i>et al.</i> (2012) <sup>35</sup>                                                                                                                                                                                                                                                                                                                                                                                                                |
|              | SMARCE1    | Yu <i>et al.</i> (2012) <sup>35</sup>                                                                                                                                                                                                                                                                                                                                                                                                                                                                                                       |
|              | TAL1       | Hu <i>et al.</i> (2009) <sup>39</sup> , Yu <i>et al.</i> (2012) <sup>35</sup>                                                                                                                                                                                                                                                                                                                                                                                                                                                               |
|              | TKT        | Huber <i>et al.</i> (2017) <sup>23</sup>                                                                                                                                                                                                                                                                                                                                                                                                                                                                                                    |

280

281

282

283 **Table S5.** List of primers used for 4C library preparation. The same reverse primer was used  
 284 for all samples.

| Name                       | Sequence                                                                      | sample |
|----------------------------|-------------------------------------------------------------------------------|--------|
| <b>EVI1<br/>prom_R1</b>    | CAAGCAGAAGACGGCATAACGAATGCAATGAATTCTCCATTC                                    | all    |
| <b>EVI1<br/>prom_GC_F6</b> | AATGATACGGCGACCACCGAACACTCTTCCCTACACG<br>ACGCTCTCCGATCTgcATTATTTAGAAGACCTGATC | DMSO   |
| <b>EVI1<br/>prom_CG_F4</b> | AATGATACGGCGACCACCGAACACTCTTCCCTACACG<br>ACGCTCTCCGATCTcgATTATTTAGAAGACCTGATC | tala   |
| <b>EVI1<br/>prom_GT_F3</b> | AATGATACGGCGACCACCGAACACTCTTCCCTACACG<br>ACGCTCTCCGATCTgtATTATTTAGAAGACCTGATC | ola    |

285

286 **Table S6.** List of exact number of biological replicates (n) for each DLA condition.

| Experiment                        | Figure                                                | Condition                                   | n  |  |
|-----------------------------------|-------------------------------------------------------|---------------------------------------------|----|--|
| <b>DLA <i>G2DHE</i> fragments</b> | 1b                                                    | all                                         | 4  |  |
| <b>DLA <i>G2DHE</i> mutants</b>   | 1c                                                    | pGL3, Prom, wildtype <i>G2DHE</i>           | 13 |  |
|                                   |                                                       | Mut 1, 5                                    | 5  |  |
|                                   |                                                       | Mut 2, 7, 9, 10, 11, 12, 15, 17, 19, 20, 21 | 3  |  |
|                                   |                                                       | Mut 3, 8                                    | 4  |  |
|                                   |                                                       | Mut 4, 6                                    | 8  |  |
|                                   |                                                       | Mut 13                                      | 9  |  |
|                                   |                                                       | Mut 14, 16, 18                              | 6  |  |
|                                   | S1b                                                   | HNT-34:                                     |    |  |
|                                   |                                                       | pGL3, Prom, wildtype <i>G2DHE</i>           | 13 |  |
|                                   |                                                       | Mut 1, 5                                    | 5  |  |
|                                   |                                                       | Mut 4, 6                                    | 8  |  |
|                                   |                                                       | Mut 1+5, 4+6                                | 3  |  |
|                                   |                                                       | Mut 8                                       | 4  |  |
|                                   |                                                       | MUTZ-3:                                     |    |  |
| All conditions                    | 5                                                     |                                             |    |  |
| MOLM-1:                           |                                                       |                                             |    |  |
|                                   | pGL3, Prom, wildtype <i>G2DHE</i> , Mut 1, 4, 5, 6, 8 | 6                                           |    |  |
|                                   | Mut 1+5, 4+6                                          | 5                                           |    |  |

287

288

289

290

291

## 292 Supplemental references

- 293 1 Gerritsen M, Yi G, Tijchon E, Kuster J, Schuringa JJ, Martens JHA *et al.* RUNX1  
294 mutations enhance self-renewal and block granulocytic differentiation in human in vitro  
295 models and primary AMLs. *Blood Adv* 2019; **3**: 320–332.
- 296 2 Gröschel S, Sanders MA, Hoogenboezem R, De Wit E, Bouwman BAM, Erpelinck C  
297 *et al.* A single oncogenic enhancer rearrangement causes concomitant EVI1 and  
298 GATA2 deregulation in Leukemia. *Cell* 2014; **157**: 369–381.
- 299 3 Gröschel S, Sanders MA, Hoogenboezem R, Zeilemaker A, Havermans M, Erpelinck  
300 C *et al.* Mutational spectrum of myeloid malignancies with inv(3)/t(3;3) reveals a  
301 predominant involvement of RAS/RTK signaling pathways. *Blood* 2015; **125**: 133–139.
- 302 4 van de Werken, HJ, Landan G, Holwerda SJ, Hoichman M, Klous P, Chachik R,  
303 Splinter E *et al.* Robust 4C-seq data analysis to screen for regulatory DNA interactions.  
304 *Nat Methods* 2012; **10**: 969–972.
- 305 5 Klein FA, Pakozdi T, Anders S, Ghavi-Helm Y, Furlong EEM, Huber W. FourCSeq:  
306 analysis of 4C sequencing data. *Bioinformatics* 2015; **31**: 3085–3091.
- 307 6 Rafiee MR, Girardot C, Sigismondo G, Krijgsveld J. Expanding the Circuitry of  
308 Pluripotency by Selective Isolation of Chromatin-Associated Proteins. *Mol Cell* 2016;  
309 **64**: 624–635.
- 310 7 Rafiee M, Sigismondo G, Kalxdorf M, Förster L, Brügger B, Béthune J *et al.* Protease-  
311 resistant streptavidin for interaction proteomics. *Mol Syst Biol* 2020; **16**.  
312 doi:10.15252/msb.20199370.
- 313 8 Cox J, Mann M. MaxQuant enables high peptide identification rates, individualized  
314 p.p.b.-range mass accuracies and proteome-wide protein quantification. *Nat*  
315 *Biotechnol* 2008; **26**: 1367–1372.

- 316 9 Tyanova S, Temu T, Cox J. The MaxQuant computational platform for mass  
317 spectrometry-based shotgun proteomics. *Nat Protoc* 2016; **11**: 2301–2319.
- 318 10 Matthew E Ritchie, Belinda Phipson, Di Wu, Yifang Hu, Charity W Law, Wei Shi *et al.*  
319 Limma Powers Differential Expression Analyses for RNA-sequencing and Microarray  
320 Studies - PubMed. *Nucleic Acids Res* 2015; **43**: e47.
- 321 11 Huang DW, Sherman BT, Lempicki RA. Bioinformatics enrichment tools: Paths toward  
322 the comprehensive functional analysis of large gene lists. *Nucleic Acids Res* 2009; **37**:  
323 1–13.
- 324 12 Huang DW, Sherman BT, Lempicki RA. Systematic and integrative analysis of large  
325 gene lists using DAVID bioinformatics resources. *Nat Protoc* 2009; **4**: 44–57.
- 326 13 Wickham H. *ggplot2: Elegant Graphics for Data Analysis*. Springer-Verlag New York.,  
327 2016<https://ggplot2.tidyverse.org> (accessed 15 Dec2020).
- 328 14 Bembom O, Ivanek R. seqLogo: Sequence logos for DNA sequence alignments.  
329 2020.<https://bioconductor.org/packages/release/bioc/html/seqLogo.html> (accessed 15  
330 Dec2020).
- 331 15 Fellmann C, Hoffmann T, Sridhar V, Hopfgartner B, Muhar M, Roth M *et al.* An  
332 optimized microRNA backbone for effective single-copy RNAi. *Cell Rep* 2013; **5**:  
333 1704–1713.
- 334 16 Cao Z, Umek RM, McKnight SL. Regulated expression of three C/EBP isoforms during  
335 adipose conversion of 3T3-L1 cells. *Genes Dev* 1991; **5**: 1538–1552.
- 336 17 Lin L, Qian Y, Shi X, Chen Y. Induction of a cell stress response gene RTP801 by  
337 DNA damaging agent methyl methanesulfonate through CCAAT/Enhancer binding  
338 protein. *Biochemistry* 2005; **44**: 3909–3914.
- 339 18 Tomaru T, Steger DJ, Lefterova MI, Schupp M, Lazar MA. Adipocyte-specific



- 340 expression of murine resistin is mediated by synergism between peroxisome  
341 proliferator-activated receptor  $\gamma$  and CCAAT/enhancer-binding proteins. *J Biol Chem*  
342 2009; **284**: 6116–6125.
- 343 19 Reinke AW, Baek J, Ashenberg O, Keating AE. Networks of bZIP protein-protein  
344 interactions diversified over a billion years of evolution. *Science (80- )* 2013; **340**: 730–  
345 734.
- 346 20 Rodríguez-Ubreva J, Ciudad L, Gómez-Cabrero D, Parra M, Bussmann LH, Di Tullio A  
347 *et al.* Pre-B cell to macrophage transdifferentiation without significant promoter DNA  
348 methylation changes. *Nucleic Acids Res* 2012; **40**: 1954–1968.
- 349 21 Yin H, Glass J. In prostate cancer cells the interaction of C/EBP $\alpha$  with Ku70, Ku80,  
350 and poly(ADP-ribose) polymerase-1 increases sensitivity to DNA damage. | BioGRID.  
351 *J Biol Chem* 2006; **281**: 11496–11505.
- 352 22 Grebien F, Vedadi M, Getlik M, Giambruno R, Grover A, Avellino R *et al.*  
353 Pharmacological targeting of the Wdr5-MLL interaction in C/EBP $\alpha$  N-terminal leukemia.  
354 *Nat Chem Biol* 2015; **11**: 571–578.
- 355 23 Huber FM, Greenblatt SM, Davenport AM, Martinez C, Xu Y, Vu LP *et al.* Histone-  
356 binding of DPF2 mediates its repressive role in myeloid differentiation. *Proc Natl Acad*  
357 *Sci U S A* 2017; **114**: 6016–6021.
- 358 24 Kitabayashi I, Aikawa Y, Nguyen L, Yokoyama A, Ohki M. Activation of AML1-  
359 mediated transcription by MOZ and inhibition by the MOZ-CBP fusion protein. |  
360 BioGRID. *EMBO J* 2001; **20**: 7184–7196.
- 361 25 Shia WJ, Okumura AJ, Yan M, Sarkeshik A, Lo MC, Matsuura S *et al.* PRMT1  
362 interacts with AML1-ETO to promote its transcriptional activation and progenitor cell  
363 proliferative potential. *Blood* 2012; **119**: 4953–4962.
- 364 26 Nguyen LA, Pandolfi PP, Aikawa Y, Tagata Y, Ohki M, Kitabayashi I. Physical and

- 365 functional link of the leukemia-associated factors AML1 and PML. *Blood* 2005; **105**:  
366 292–300.
- 367 27 Philipot O, Joliot V, Ait-Mohamed O, Pellentz C, Robin P, Fritsch L *et al.* The core  
368 binding factor CBF negatively regulates skeletal muscle terminal differentiation. *PLoS*  
369 *One* 2010; **5**: e9425.
- 370 28 Imai Y, Kurokawa M, Yamaguchi Y, Izutsu K, Nitta E, Mitani K *et al.* The Corepressor  
371 mSin3A Regulates Phosphorylation-Induced Activation, Intranuclear Location, and  
372 Stability of AML1. *Mol Cell Biol* 2004; **24**: 1033–1043.
- 373 29 Yamaguchi Y, Kurokawa M, Imai Y, Izutsu K, Asai T, Ichikawa M *et al.* AML1 Is  
374 Functionally Regulated through p300-mediated Acetylation on Specific Lysine  
375 Residues. *J Biol Chem* 2004; **279**: 15630–15638.
- 376 30 Kim DY, Kwon E, Hartley PD, Crosby DC, Mann S, Krogan NJ *et al.* CBF $\beta$  Stabilizes  
377 HIV Vif to Counteract APOBEC3 at the Expense of RUNX1 Target Gene Expression.  
378 *Mol Cell* 2013; **49**: 632–644.
- 379 31 Leong WY, Guo H, Ma O, Huang H, Cantor AB, Friedman AD. Runx1 phosphorylation  
380 by Src increases trans-activation via augmented stability, reduced histone deacetylase  
381 (HDAC) binding, and increased DNA affinity, and activated Runx1 favors  
382 granulopoiesis. *J Biol Chem* 2016; **291**: 826–836.
- 383 32 Warren AJ, Bravo J, Williams RL, Rabbitts TH. Structural basis for the heterodimeric  
384 interaction between the acute leukaemia-associated transcription factors AML1 and  
385 CBF $\beta$ . *EMBO J* 2000; **19**: 3004–3015.
- 386 33 Yonezawa T, Takahashi H, Shikata S, Liu X, Tamura M, Asada S *et al.* The ubiquitin  
387 ligase STUB1 regulates stability and activity of RUNX1 and RUNX1–RUNX1T1. *J Biol*  
388 *Chem* 2017; **292**: 12528–12541.
- 389 34 Luck K, Kim DK, Lambourne L, Spirohn K, Begg BE, Bian W *et al.* A reference map of

390 the human binary protein interactome. *Nature* 2020; **580**: 402–408.

391 35 Yu M, Mazor T, Huang H, Huang HT, Kathrein KL, Woo AJ *et al.* Direct Recruitment of  
392 Polycomb Repressive Complex 1 to Chromatin by Core Binding Transcription Factors.  
393 *Mol Cell* 2012; **45**: 330–343.

394 36 Aikawa Y, Nguyen LA, Isono K, Takakura N, Tagata Y, Schmitz ML *et al.* Roles of  
395 HIPK1 and HIPK2 in AML1- and p300-dependent transcription, hematopoiesis and  
396 blood vessel formation. *EMBO J* 2006; **25**: 3955–3965.

397 37 Zhou N, Gutierrez-Uzquiza A, Zheng XY, Chang R, Vogl DT, Garfall AL *et al.* RUNX  
398 proteins desensitize multiple myeloma to lenalidomide via protecting IKZFs from  
399 degradation. *Leukemia* 2019; **33**: 2006–2021.

400 38 Bakshi R, Hassan MQ, Pratap J, Lian JB, Montecino MA, Van Wijnen AJ *et al.* The  
401 human SWI/SNF complex associates with RUNX1 to control transcription of  
402 hematopoietic target genes. *J Cell Physiol* 2010; **225**: 569–576.

403 39 Hu X, Li X, Valverde K, Fu X, Noguchi C, Qiu Y *et al.* LSD1-mediated epigenetic  
404 modification is required for TAL1 function and hematopoiesis. *Proc Natl Acad Sci U S*  
405 *A* 2009; **106**: 10141–10146.

406 40 Garber M, Guttman M, Clamp M, Zody MC, Friedman N, Xie X. Identifying Novel  
407 Constrained Elements by Exploiting Biased Substitution Patterns. *Bioinformatics* 2009;  
408 **25**: i54-62.

409

## 410 **Supplemental figures**

411 **Fig. S1. *G2DHE* mutants used for dual luciferase assay.** **a** *In silico* analysis of the *G2DHE*  
412 element revealed several putative TF binding sites (TFBS) as identified with the  
413 JASPAR2016 and the Alggen Promo (TRANSFAC) tool. The names of the TFs are indicated  
414 in bold and the respective database identifier is written in parentheses. Position weight  
415 matrices of the human proteins were used for the analysis except for IKZF1 where the  
416 murine (m) matrix was used for prediction. Sequence logos are shown for those sites  
417 identified with the JASPAR2016 database. The wildtype (WT) and mutant (M) enhancer  
418 sequences are shown for each predicted site. For the JASPAR2016 analysis a relative  
419 similarity score  $\geq 0.80$  was considered relevant and for the TRANSFAC database a relative  
420 dissimilarity score of  $< 15\%$  was used. **b** Luciferase reporter assay in three different leukemic  
421 cell lines with 3q-rearrangements for chosen mutations (Mut) and their respective TFBS  
422 ( $n \geq 3$ ). TFBS in parentheses are in close proximity to the mutations without being affected by  
423 them. Cells were co-transfected with the luciferase reporter plasmid pGL3 and the *Renilla*  
424 control plasmid. pGL3 empty vector (pGL3), pGL3 vector containing the *EVI1* promoter  
425 (Prom), and pGL3 vector containing the *EVI1* promoter and the wildtype *G2DHE* were used  
426 as controls (CTRL). Luciferase signal was normalized to *Renilla* signal. The relative  
427 luciferase signal was further normalized to the signal of the wildtype *G2DHE* (red line).  
428 Statistical significance was calculated with two-sided one-sample t-tests.

429

430 **Fig. S2. CEBPA and RUNX1 expression, association with *G2DHE*, and ChIP-SICAP**  
431 **results.** **a** Western blot to show the expression levels of CEBPA and RUNX1 in different 3q-  
432 rearranged and non-3q-rearranged cell lines. **b** Quantification of CEBPA and RUNX1 protein  
433 expression of the cell lines shown in a. **c** ChIP-Seq binding profiles of CEBPA and RUNX1 in  
434 leukemic cell lines. Light blue track: CEBPA ChIP-Seq peaks in 3q-rearranged MOLM-1.  
435 Dark blue track: RUNX1 ChIP-Seq peaks of *de novo* AML cell patient samples (dataset  
436 GSM3734708 by Gerritsen *et al.*).<sup>1</sup> Numbers show the data range. Dark grey: Conservation

437 (SiPhy rate 10 mer).<sup>40</sup> The core enhancer sequence, the qPCR product used for detection in  
438 ChIP-SICAP-qPCR, and the pull-down (PD) probe are annotated in black, the predicted  
439 CEBPA TFBS in light blue, and the predicted RUNX1 TFBS in dark blue. **d-f** ChIP-SICAP  
440 was performed in three different 3q-rearranged cell lines using antibodies against CEBPA  
441 and RUNX1, or an unspecific IgG control. Experiments were carried out in duplicates (n=2).  
442 **d** The DNA fraction of the ChIP-SICAP experiment was used for enrichment quantification of  
443 the *G2DHE* region by qPCR compared to two unrelated control regions (CTRL). **e-f** The  
444 protein fraction of the ChIP-SICAP experiments was analyzed by mass spectrometry to  
445 identify chromatin-bound interactors of RUNX1 and CEBPA. **e** The fold change of the  
446 intensity of CEBPA or RUNX1 samples over the IgG control was calculated for both  
447 replicates (R1 and R2). A cut-off of 20 was used for all proteins with a fold change >20. The  
448 graph shows the correlation between replicate 1 and 2. Marked in red is the threshold of fold  
449 change = 2. **f** Proteins enriched in the CEBPA- or RUNX1-captured samples over the IgG  
450 controls were ranked according to their iBAQ intensity.

451

452 **Fig. S3. GOTERM and BioGRID analysis of proteins identified with ChIP-SICAP.**

453 Proteins identified in at least two cell lines per bait protein were fed into the DAVID online  
454 tool and analyzed according to their cellular component (CC), biological pathway (BP), and  
455 molecular function (MF) according to GOTERM. Known human and murine interactors of  
456 CEBPA and RUNX1 were extracted from BioGRID and annotated accordingly. **a** Analysis of  
457 CEBPA interactors. **b** Analysis of RUNX1 interactors. **c** Potential true positive (PTP) and  
458 potential false positive (PFP) hits. Relative protein intensities (iBAQ) are shown for the  
459 average of RUNX1 and CEBPA ChIP-SICAP assays. Proteins were categorized into PTP if  
460 they are interactors of CEBPA and RUNX1, chromatin or DNA-binders or if they have nuclear  
461 localization. Proteins were categorized as PFP if they are ribosomal proteins or cytoplasmic  
462 proteins. Please note that the categories are exclusive meaning that if a protein falls into a  
463 category, it is not considered in the next categories.

464 **Fig. S4. Western blot quantification of MUTZ-3 treated with PARPi or *PARP1* shRNAs**  
465 **shows reduction in EVI1 protein levels. a** MUTZ-3 cells were treated with 10  $\mu$ M olaparib  
466 (ola), 1  $\mu$ M talazoparib (tala), or DMSO or were left untreated for 24 h (n=3). Proteins were  
467 extracted from cells treated with PARPi and EVI1 was measured by western blot.  $\beta$ -Actin was  
468 used as loading control. Protein bands were quantified and normalized to the loading control  
469 and DMSO. Statistical significance was calculated using two-sided two-sample t-tests. **b**  
470 MUTZ-3 cells were lentivirally transduced with constructs encoding shRNAs against *PARP1*  
471 or *Renilla* (REN) and selected with puromycin. Samples were harvested on day 3 of  
472 puromycin selection, and protein levels were analyzed by western blot using antibodies  
473 against PARP1 and EVI1.  $\beta$ -Actin served as a loading control. A miR-E construct targeting  
474 *Renilla* (REN) and untreated parental cells served as non-targeting controls.

475

476 **Fig. S5. PARPi sensitivity in different AML cell lines.** Cells were treated with the indicated  
477 amounts of olaparib or talazoparib (n=3). Metabolic activity was measured as an indicator of  
478 cell viability by CellTiter-Glo assay. The values were normalized to those of the 0 h time point  
479 and to the DMSO control of each time point.

480

481 **Fig. S6. RNA-Seq following PARPi in *inv(3)* AML cells.** MUTZ-3 cells were treated with  
482 10  $\mu$ M olaparib, 1  $\mu$ M talazoparib, or DMSO, and RNA was harvested for sequencing after 12  
483 h, 24 h, and 48 h. **a** Heatmap of clusters identified. The top most variable 1 500 genes in the  
484 samples treated with PARPi were selected, and clustered into 4 profile clusters using k-  
485 means. Experiment, time, and treatment type were used as variables. **b-e** Pathway  
486 enrichment analysis of the clusters identified in **a**. Shown is the number of genes of the  
487 cluster assigned to the pathway (gene count), the proportion of genes from this cluster that  
488 were assigned to the pathway (GeneRatio), and the adjusted p-value.

489

490 **Figure S7. Genes deregulated by PARPi and *EVI1* knockdown as identified by RNA-**  
491 **Seq. **a** and **c**** Commonly downregulated (a) and upregulated (c) genes by PARPi and *EVI1*  
492 knockdown as identified by RNA-Seq. Genes included in cluster 3 of the PARPi data were  
493 compared to the genes deregulated by *EVI1* knockdown to determine the genes  
494 downregulated by both conditions. The same was performed using cluster 4 of the PARPi  
495 data for determining upregulated genes. Fold change of gene expression under treatment  
496 conditions (PARPi or shEVI1, respectively) over the control (DMSO or non-targeting control,  
497 respectively) is shown. **b** and **d** Pathway enrichment analysis of the commonly  
498 downregulated (b) and upregulated (d) genes identified in **a** and **c**. Shown is the number of  
499 genes assigned to the pathway (gene count), the proportion of genes from this cluster that  
500 were assigned to the pathway (GeneRatio), and the adjusted p-value.

501

502 **Figure S1**

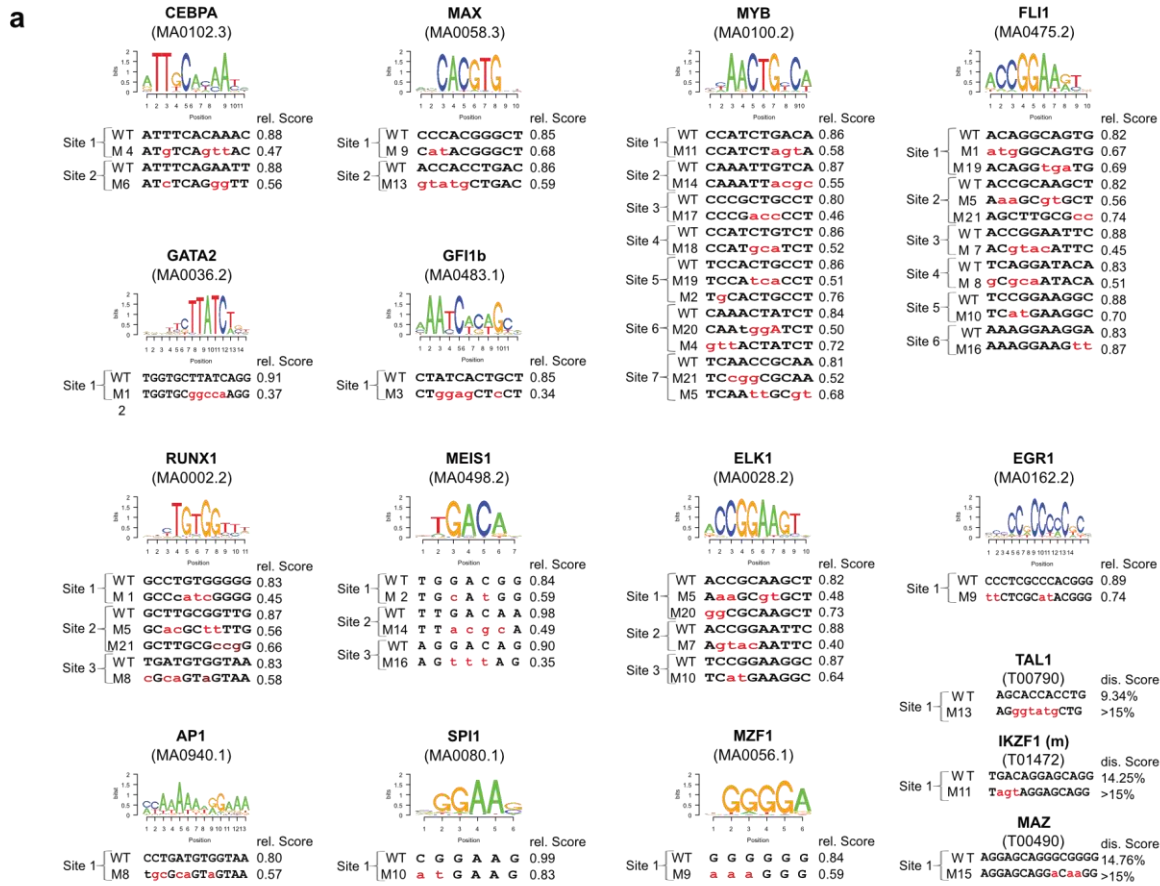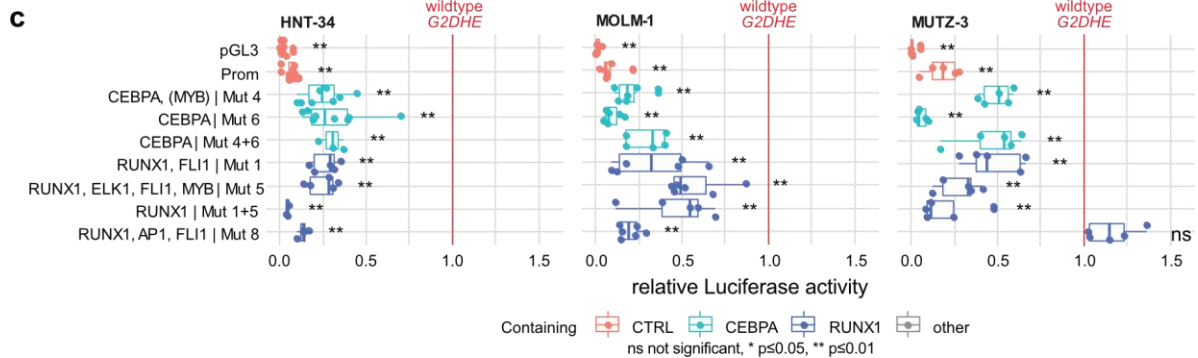

503

504



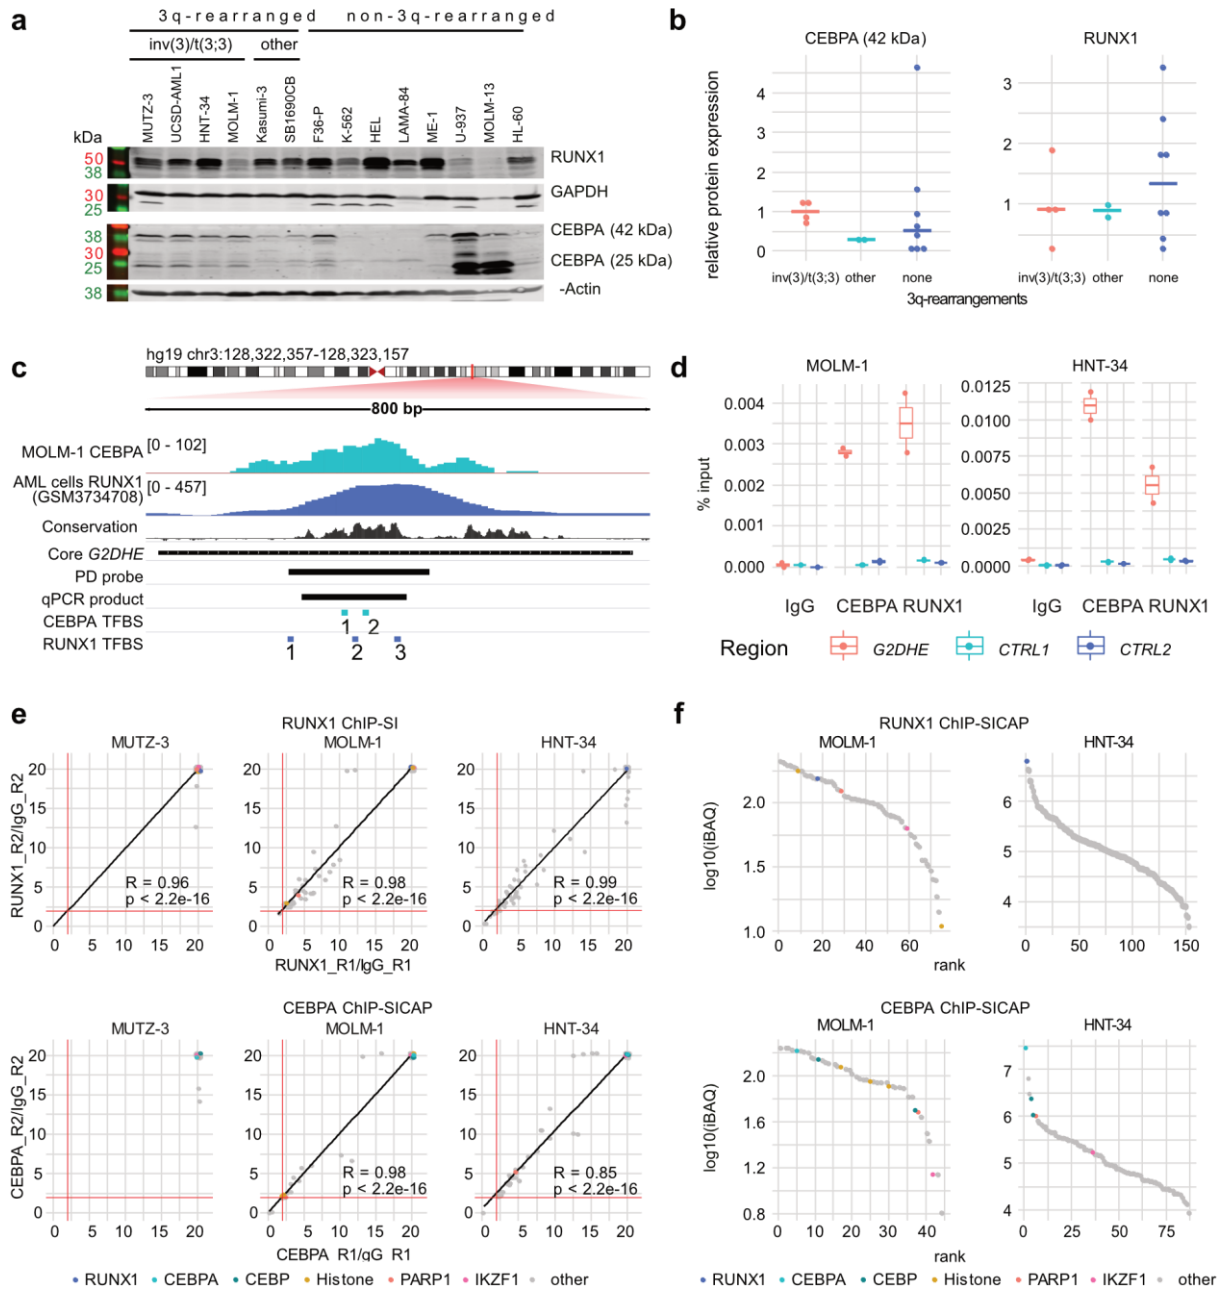

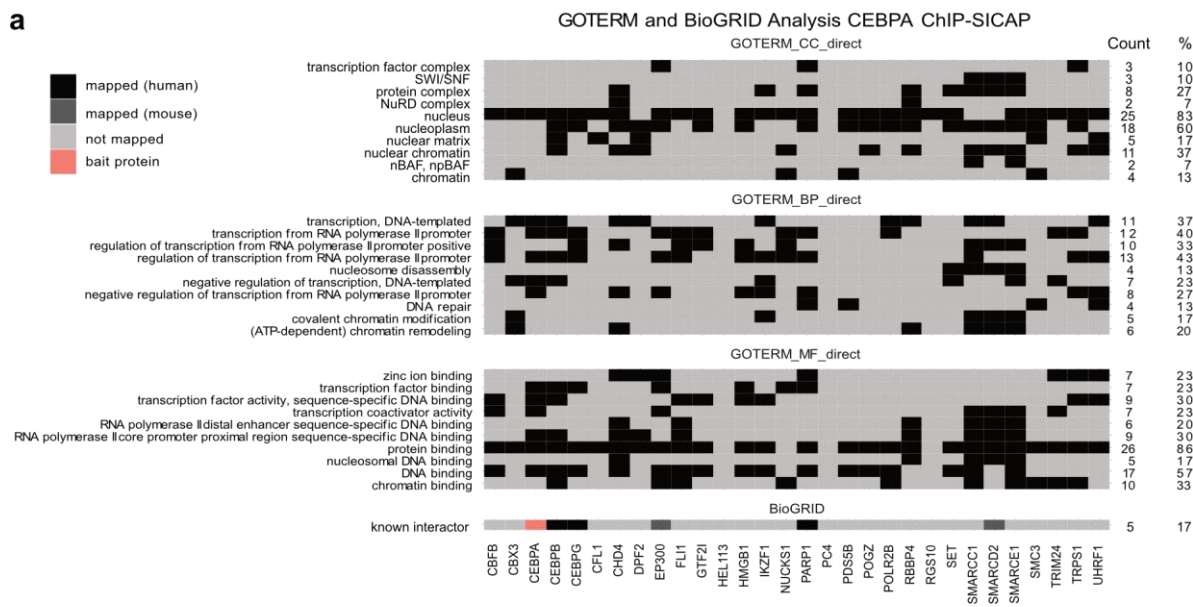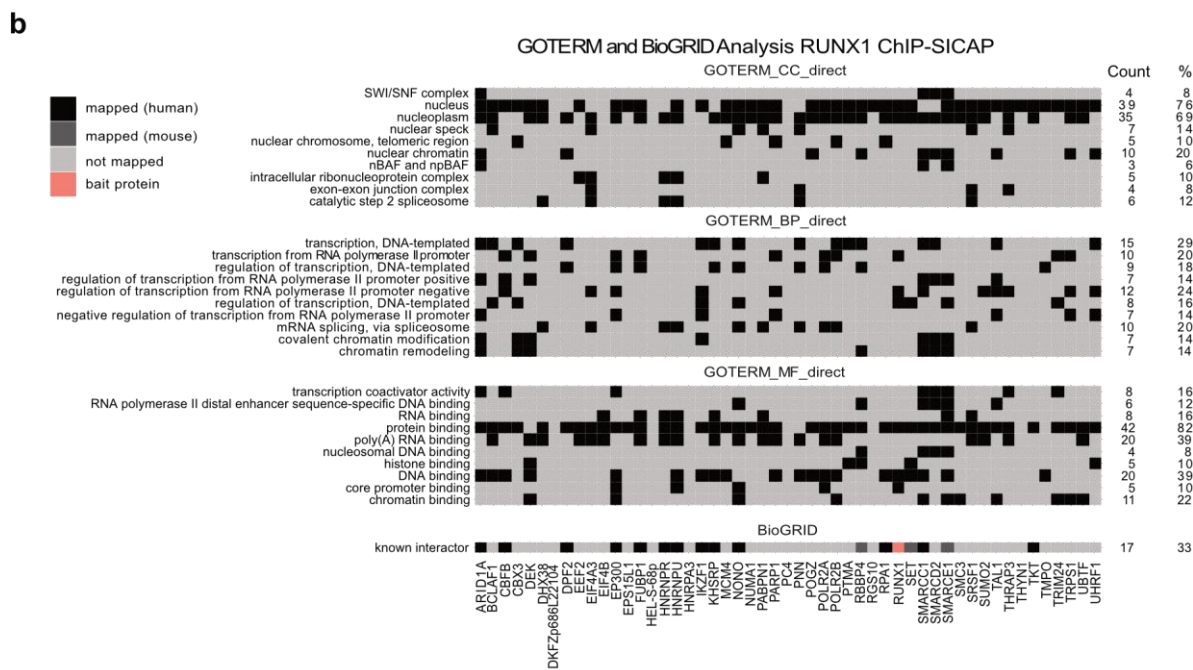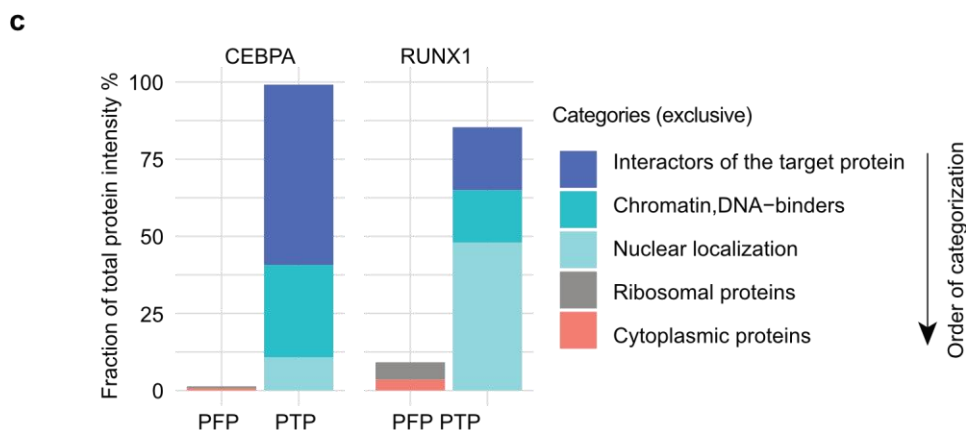

509 **Figure S4**

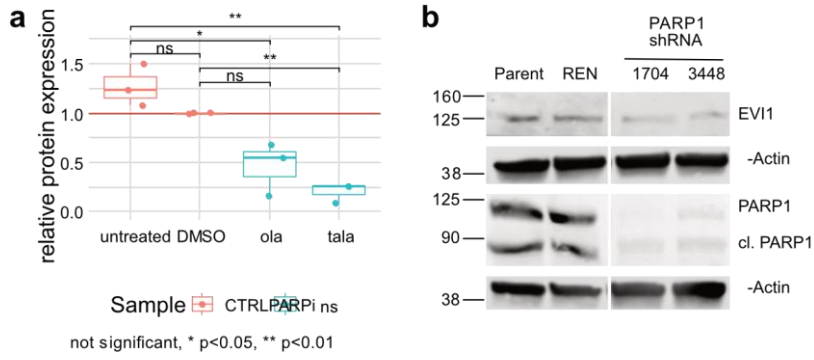

510

511

512 **Figure S5**

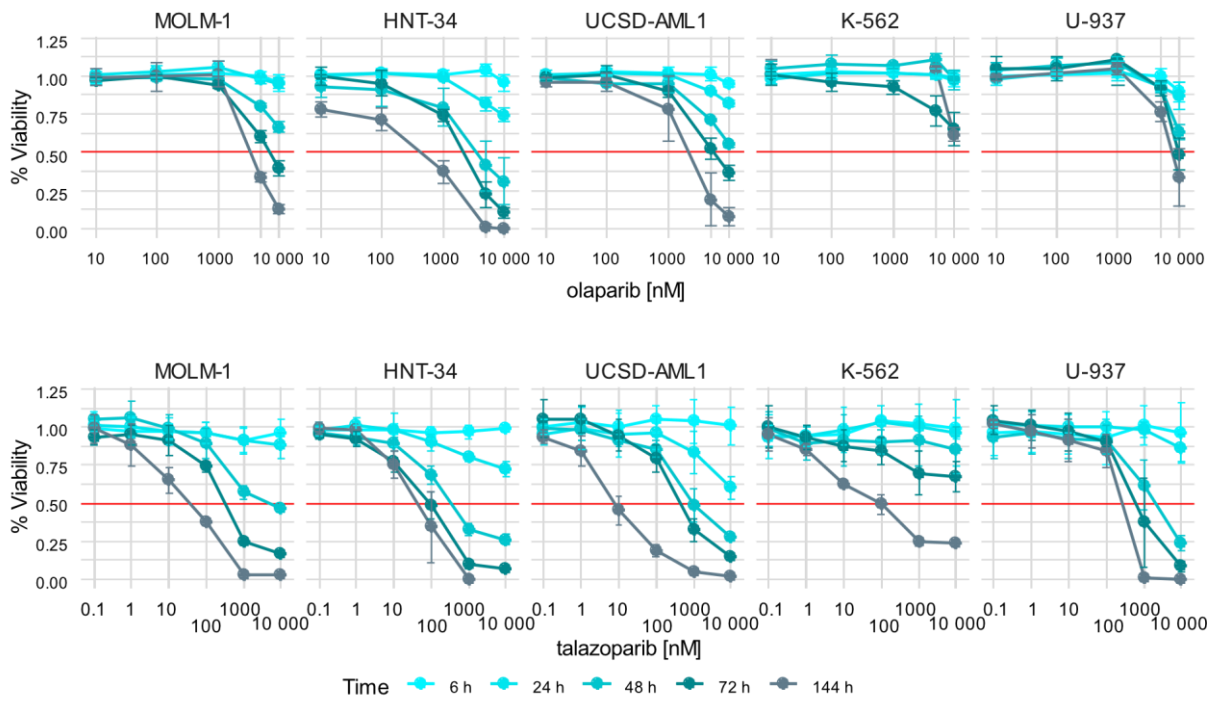

513

514

515 **Figure S6**

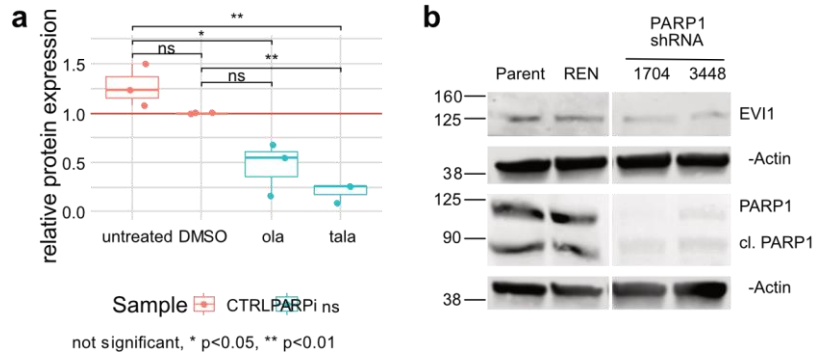

516

517

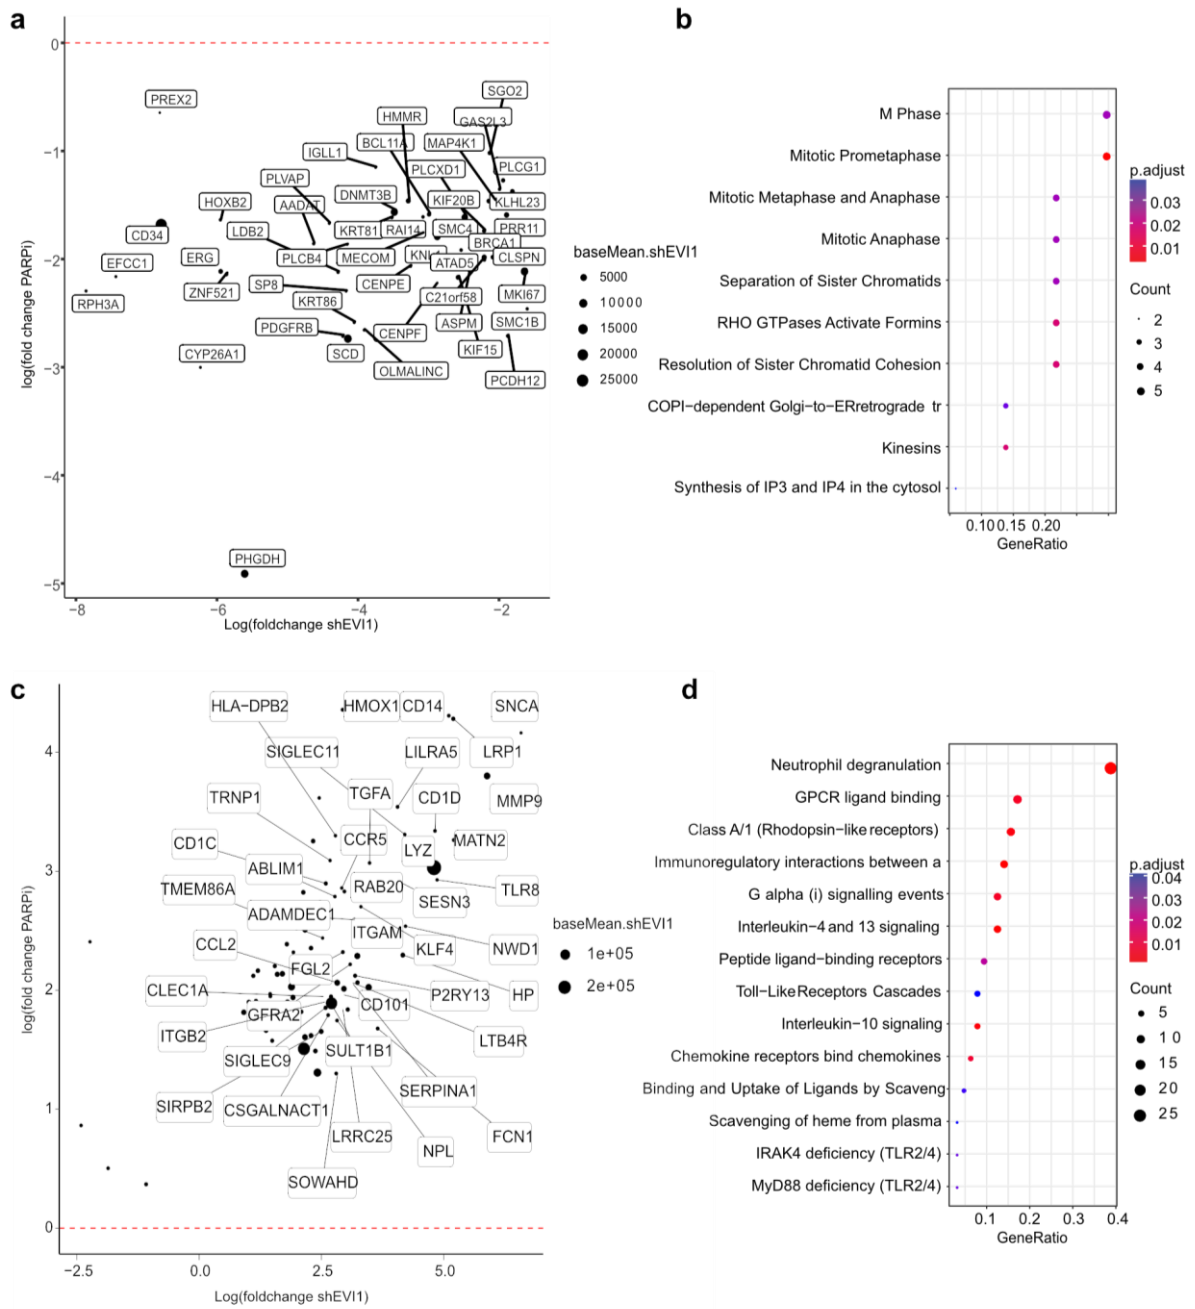

519

520

## 521 **Supplemental files**

522 The supplementary File S1 “ChIP-SICAP results.xlsx” summarizes the proteins identified by  
523 ChIP-SICAP using CEBPA and RUNX1 as baits in the cell lines MUTZ-3, MOLM-1 and HNT-  
524 34. Given are the official gene names and Uniprot IDs, as well as the intensity ratios of  
525 Bait/IgG for both replicates, the average log of the intensity ratios, the average log of the  
526 iBAQ intensities, the p-values and the adjusted p-values (p.adj.).

527 The supplementary File S2 “TPM values.xlsx” summarizes the normalized transcript per  
528 million (TPM) values of *EVI1* and *PARP1* transcripts from RNA-Seq data of primary human  
529 AML patient samples (n=73) and cell lines (n=9) and states their karyotype. The occurrence  
530 of inv(3)/t(3;3) is marked in an additional column.

531 The supplementary File S3 “diffExprGenes.xlsx” contains the RNA-Seq results and  
532 summarizes the differentially expressed genes after 48 h PARPi treatment or *EVI1*  
533 knockdown, respectively. Shown are the mean expression value (baseMean), the gene  
534 expression foldchange over the control (DMSO in case of PARPi and non-targeting control in  
535 case of *EVI1* Knockdown) as well as the p-values and adjusted p-values.
